# Supplementary material for: A Novel Imidazopyridine Derivative Exerts Anticancer Activity by Inducing Mitochondrial Pathway-Mediated Apoptosis
Source: PubMed Central journal article supplement (PMC7468608; doi:10.1155/2020/4929053), 2020-08-25
Supplement: 4929053.f1.pdf [file 4929053.f1.pdf]

## Supplemental figures

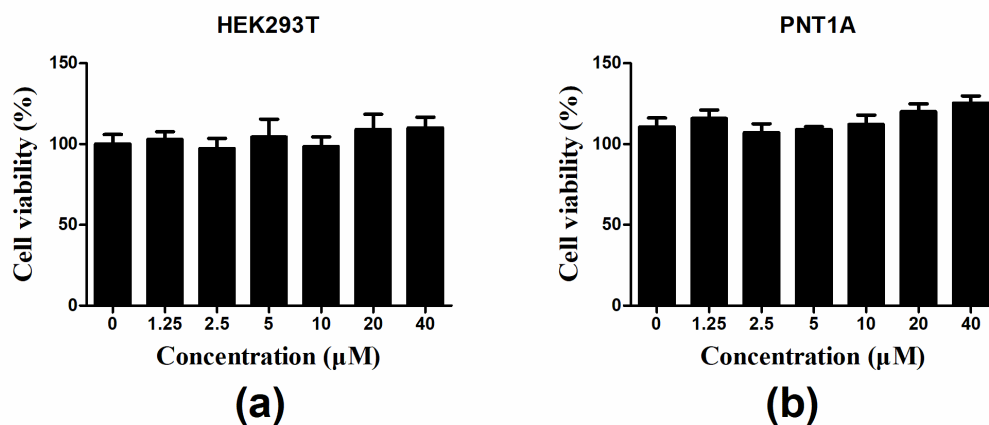

Figure S1. Compound **9i** did not affect normal human cells' viability. HEK293T (a) cells and PNT1A (b) cells viability was measured after different concentration of compound **9i** treated for 48 hours. There was no significant difference between each concentration group.

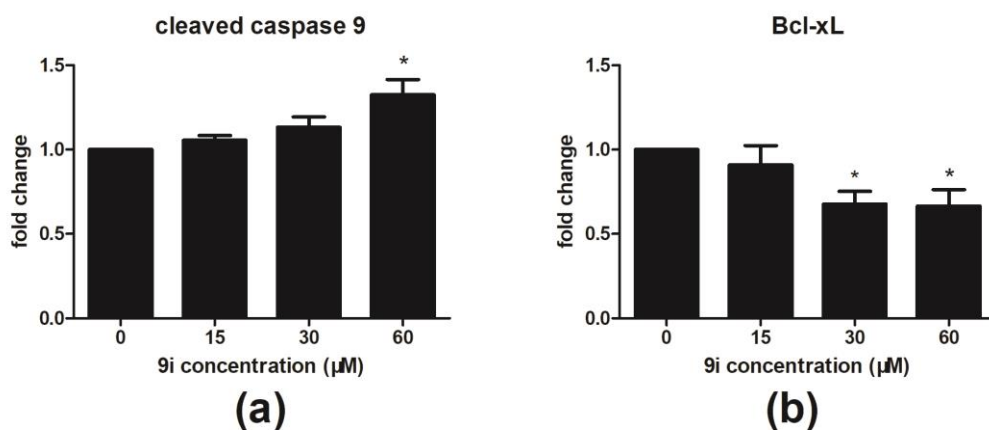

Figure S2. Relative fold change in protein expression of cleaved caspase 9 (a) and Bcl-xL (b) in western blot images from Figure 4 and Figure 5. Significance was tested by Student t-test; \*:  $p < 0.05$  versus DMSO treated cells. The results were representative of four independent experiments.
